# Supplementary material for: Aortic Stiffness and White Matter Microstructural Integrity Assessed by Diffusion Tensor Imaging: The ARIC‐NCS
Source: PubMed Central journal article supplement — J Am Heart Assoc. 2020 Mar 11;9(6):e014868. doi: 10.1161/JAHA.119.014868 (PMC7335527; doi:10.1161/jaha.119.014868), 2020-03-11
Supplement: JAH3-9-e014868-s001.pdf [file JAH3-9-e014868-s001.pdf]

# **Supplemental Material**

**Table S1. Characteristics of participants included in the analysis and the whole sample with cfPWV at visit 5.**

|                                                      | Participants included<br>in the study<br>(n=1,484) | All visit 5 participants<br>with inclusion criteria*<br>(n=4,539) |
|------------------------------------------------------|----------------------------------------------------|-------------------------------------------------------------------|
| Age, year, mean $\pm$ SD                             | 76.1 $\pm$ 5.2                                     | 75.2 $\pm$ 5.0                                                    |
| Sex, men, n (%)                                      | 597 (40.2)                                         | 1,832 (40.4)                                                      |
| Race, African Americans, n (%)                       | 425 (28.6)                                         | 984 (21.7)                                                        |
| Center, n (%)                                        |                                                    |                                                                   |
| Forsyth, NC                                          | 352 (23.7)                                         | 943 (20.8)                                                        |
| Jackson, MS                                          | 403 (27.2)                                         | 925 (20.4)                                                        |
| Minneapolis, MN                                      | 327 (22.0)                                         | 1,388 (30.6)                                                      |
| Washington, MD                                       | 402 (27.1)                                         | 1,283 (28.3)                                                      |
| Education, high school or above, n (%)               |                                                    |                                                                   |
| Below high school                                    | 198 (13.2)                                         | 574 (12.7)                                                        |
| High school                                          | 612 (41.3)                                         | 1,911 (42.2)                                                      |
| College or above                                     | 672 (45.3)                                         | 2,047 (45.2)                                                      |
| Body mass index, kg/m <sup>2</sup> , mean $\pm$ SD   | 27.7 $\pm$ 4.5                                     | 27.8 $\pm$ 4.5                                                    |
| Ever smoking, n (%)                                  | 785 (55.1)                                         | 2,402 (55.6)                                                      |
| Ever drinking, n (%)                                 | 1,119 (76.0)                                       | 3,535 (78.8)                                                      |
| Mean arterial pressure, mmHg, mean $\pm$ SD          | 87.8 $\pm$ 11.4                                    | 87.5 $\pm$ 11.3                                                   |
| Hypertension, n (%)                                  | 1,080 (73.4)                                       | 3,239 (72.1)                                                      |
| Use of antihypertensive drug, n (%)                  | 1,083 (73.0)                                       | 3,262 (72.0)                                                      |
| Diabetes, n (%)                                      | 392 (26.7)                                         | 1,135 (25.2)                                                      |
| Heart rate, bpm, mean $\pm$ SD                       | 64.5 $\pm$ 11.0                                    | 64.7 $\pm$ 10.9                                                   |
| Carotid-femoral pulse wave velocity, m/s             | 11.8 $\pm$ 3.3                                     | 11.6 $\pm$ 3.1                                                    |
| Total physical activity, minutes/week, mean $\pm$ SD | 180.9 $\pm$ 176.6                                  | 192.5 $\pm$ 187.6                                                 |
| APOE, n (%)                                          |                                                    |                                                                   |
| APOE4 $\geq$ 1                                       | 1,003 (69.9)                                       | 3,119 (71.4)                                                      |
| APOE4 <1                                             | 431 (30.1)                                         | 1,247 (28.6)                                                      |
| Cognitive status, n (%)                              |                                                    |                                                                   |
| Normal                                               | 937 (63.1)                                         | 3514 (77.7)                                                       |
| Mild cognitive impairment                            | 481 (32.4)                                         | 872 (19.3)                                                        |
| Dementia                                             | 64 (4.3)                                           | 128 (2.8)                                                         |

\*This applies to all inclusion criteria based on cfPWV

**Table S2. Mean fractional anisotropy (FA) and mean diffusivity (MD) among included and excluded participants. ARIC study examination visit 5.**

| Regions                   | FA                  |                       |                       | MD ( $10^{-4}$ mm <sup>2</sup> /s) |                       |                    |
|---------------------------|---------------------|-----------------------|-----------------------|------------------------------------|-----------------------|--------------------|
|                           | Excluded<br>(n=458) | Included<br>(n=1,484) | Difference<br>(SE)    | Excluded<br>(n=458)                | Included<br>(n=1,484) | Difference<br>(SE) |
| Anterior corpus callosum  | <b>0.407±0.06</b>   | <b>0.424±0.06</b>     | <b>-0.017 (0.003)</b> | <b>11.9±1.2</b>                    | <b>11.6±1.1</b>       | <b>0.3 (0.06)</b>  |
| Posterior corpus callosum | <b>0.559±0.07</b>   | <b>0.578±0.06</b>     | <b>-0.019 (0.003)</b> | <b>11.4±1.1</b>                    | <b>11.1±1.0</b>       | <b>0.3 (0.06)</b>  |
| Frontal lobe              | <b>0.271±0.02</b>   | <b>0.280±0.02</b>     | <b>-0.009 (0.001)</b> | <b>8.8±0.6</b>                     | <b>8.6±0.5</b>        | <b>0.3 (0.03)</b>  |
| Temporal lobe             | <b>0.275±0.02</b>   | <b>0.283±0.02</b>     | <b>-0.008 (0.001)</b> | <b>9.0±0.7</b>                     | <b>8.8±0.5</b>        | <b>0.3 (0.03)</b>  |
| Occipital lobe            | <b>0.223±0.03</b>   | <b>0.229±0.02</b>     | <b>-0.007 (0.001)</b> | <b>9.0±0.7</b>                     | <b>8.8±0.6</b>        | <b>0.2 (0.03)</b>  |
| Parietal lobe             | <b>0.290±0.03</b>   | <b>0.300±0.02</b>     | <b>-0.010 (0.001)</b> | <b>9.0±0.7</b>                     | <b>8.7±0.6</b>        | <b>0.3 (0.03)</b>  |
| Overall                   | <b>0.275±0.02</b>   | <b>0.284±0.02</b>     | <b>-0.009 (0.001)</b> | <b>9.0±0.6</b>                     | <b>8.7±0.5</b>        | <b>0.3 (0.03)</b>  |

T-test was conducted for FAs and MDs listed above. Bold indicates at  $p < 0.05$  from a t-test.

**Table S3. Correlations between FA and MD at different regions.**

| <b>Regions</b>            | <b>Correlation</b> | <b>P value</b> |
|---------------------------|--------------------|----------------|
| Frontal lobe              | -0.75              | <0.0001        |
| Temporal lobe             | -0.63              | <0.0001        |
| Occipital lobe            | -0.68              | <0.0001        |
| Parietal lobe             | -0.67              | <0.0001        |
| Anterior corpus callosum  | -0.50              | <0.0001        |
| Posterior corpus callosum | -0.66              | <0.0001        |
| Overall                   | -0.75              | <0.0001        |

ARIC study examination visit 5.

**Table S4. Association of cfPWV and z-scores of FA. Mean differences estimated by multivariable linear regression by cognitive status.**

| Regions                   | Cognitive status        | cfPWV (m/s)                            |                   |                                        |              |                                         |               |                                         |              |
|---------------------------|-------------------------|----------------------------------------|-------------------|----------------------------------------|--------------|-----------------------------------------|---------------|-----------------------------------------|--------------|
|                           |                         | Model 1<br>β (95% CI)                  | P value           | Model 2<br>β (95% CI)                  | P value      | Model 3<br>β (95% CI)                   | P value       | Model 4<br>β (95% CI)                   | P value      |
| Anterior corpus callosum  | Normal<br>(n=937)       | <b>-0.04</b><br><b>(-0.06, -0.01)</b>  | <b>0.001</b>      | <b>-0.03</b><br><b>(-0.05, -0.01)</b>  | <b>0.01</b>  | -0.01<br>(-0.04, 0.01)                  | 0.30          | -0.01<br>(-0.03, 0.01)                  | 0.37         |
|                           | MCI/dementia<br>(n=545) | <b>-0.03</b><br><b>(-0.05, -0.004)</b> | <b>0.02</b>       | -0.02<br>(-0.05, 0.003)                | 0.08         | -0.03<br>(-0.06, 0.001)                 | 0.06          | -0.03<br>(-0.05, 0.002)                 | 0.07         |
| Posterior corpus callosum | Normal<br>(n=937)       | <b>-0.02</b><br><b>(-0.04, -0.001)</b> | <b>0.04</b>       | -0.01<br>(-0.03, 0.01)                 | 0.19         | -0.02<br>(-0.04, 0.005)                 | 0.13          | -0.01<br>(-0.03, 0.01)                  | 0.22         |
|                           | MCI/dementia<br>(n=545) | <b>-0.03</b><br><b>(-0.06, -0.003)</b> | <b>0.03</b>       | -0.02<br>(-0.04, 0.01)                 | 0.23         | <b>-0.03</b><br><b>(-0.06, -0.0001)</b> | <b>0.05</b>   | -0.03<br>(-0.06, 0.001)                 | 0.06         |
| Frontal lobe              | Normal<br>(n=937)       | <b>-0.06</b><br><b>(-0.08, -0.04)</b>  | <b>&lt;0.0001</b> | <b>-0.03</b><br><b>(-0.05, -0.01)</b>  | <b>0.002</b> | <b>-0.03</b><br><b>(-0.05, -0.01)</b>   | <b>0.01</b>   | <b>-0.02</b><br><b>(-0.04, -0.0001)</b> | <b>0.05</b>  |
|                           | MCI/dementia<br>(n=545) | <b>-0.05</b><br><b>(-0.08, -0.03)</b>  | <b>&lt;0.0001</b> | <b>-0.03</b><br><b>(-0.05, -0.01)</b>  | <b>0.01</b>  | <b>-0.03</b><br><b>(-0.05, -0.0000)</b> | <b>0.05</b>   | <b>-0.02</b><br><b>(-0.05, -0.0004)</b> | <b>0.05</b>  |
| Temporal lobe             | Normal<br>(n=937)       | <b>-0.03</b><br><b>(-0.05, -0.01)</b>  | <b>0.002</b>      | -0.02<br>(-0.04, 0.003)                | 0.09         | <b>-0.04</b><br><b>(-0.06, -0.02)</b>   | <b>0.0003</b> | <b>-0.03</b><br><b>(-0.06, -0.01)</b>   | <b>0.002</b> |
|                           | MCI/dementia<br>(n=545) | -0.02<br>(-0.04, 0.01)                 | 0.17              | -0.01<br>(-0.03, 0.02)                 | 0.56         | -0.02<br>(-0.05, 0.01)                  | 0.22          | -0.02<br>(-0.05, 0.01)                  | 0.25         |
| Occipital lobe            | Normal<br>(n=936)       | <b>-0.03</b><br><b>(-0.05, -0.004)</b> | <b>0.02</b>       | -0.02<br>(-0.04, 0.01)                 | 0.16         | -0.02<br>(-0.04, 0.01)                  | 0.17          | -0.01<br>(-0.04, 0.01)                  | 0.30         |
|                           | MCI/dementia<br>(n=545) | <b>-0.03</b><br><b>(-0.06, -0.01)</b>  | <b>0.004</b>      | <b>-0.03</b><br><b>(-0.05, -0.004)</b> | <b>0.02</b>  | <b>-0.03</b><br><b>(-0.05, -0.001)</b>  | <b>0.04</b>   | <b>-0.03</b><br><b>(-0.05, -0.001)</b>  | <b>0.05</b>  |
| Parietal lobe             | Normal<br>(n=937)       | <b>-0.04</b><br><b>(-0.06, -0.02)</b>  | <b>0.0003</b>     | -0.01<br>(-0.03, 0.01)                 | 0.24         | <b>-0.03</b><br><b>(-0.05, -0.004)</b>  | <b>0.02</b>   | -0.01<br>(-0.03, 0.005)                 | 0.15         |
|                           | MCI/dementia<br>(n=545) | <b>-0.04</b><br><b>(-0.07, -0.02)</b>  | <b>0.002</b>      | -0.02<br>(-0.04, 0.003)                | 0.09         | -0.02<br>(-0.05, 0.01)                  | 0.11          | -0.02<br>(-0.04, 0.005)                 | 0.12         |
| Overall                   | Normal<br>(n=936)       | <b>-0.05</b><br><b>(-0.07, -0.03)</b>  | <b>&lt;0.0001</b> | <b>-0.03</b><br><b>(-0.04, -0.01)</b>  | <b>0.01</b>  | <b>-0.03</b><br><b>(-0.05, -0.01)</b>   | <b>0.003</b>  | <b>-0.02</b><br><b>(-0.04, -0.003)</b>  | <b>0.03</b>  |
|                           | MCI/dementia<br>(n=545) | <b>-0.05</b><br><b>(-0.07, -0.02)</b>  | <b>0.0003</b>     | <b>-0.03</b><br><b>(-0.05, -0.004)</b> | <b>0.02</b>  | <b>-0.03</b><br><b>(-0.06, -0.001)</b>  | <b>0.04</b>   | <b>-0.03</b><br><b>(-0.05, -0.001)</b>  | <b>0.04</b>  |

Bold indicates statistical significance. β is the difference (unadjusted for Model 1, adjusted for Model 2 to Model 4) of MDs between high and non-high cfPWV.

Model 1: Unadjusted.

Model 2: Adjusted for volume of white matter hyperintensities.

Model 3: Adjusted for age, sex, race-center, education, APOE genotype, ever smoking, ever drinking, body mass index, mean arterial pressure, diabetes, physical activity (total minutes/week), LDL-C, heart rate

Model 4: Adjusted for factors included in Model 2 and Model 3.

**Table S6. Association of cfPWV and z-scores of FA (n=1484). Mean differences estimated by multivariable linear regression by WMH volumes.**

| Regions                   | Cognitive status        | cfPWV (m/s)                            |                   |                                        |              |                                       |              |                                        |              |
|---------------------------|-------------------------|----------------------------------------|-------------------|----------------------------------------|--------------|---------------------------------------|--------------|----------------------------------------|--------------|
|                           |                         | Model 1<br>β (95% CI)                  | P value           | Model 2<br>β (95% CI)                  | P value      | Model 3<br>β (95% CI)                 | P value      | Model 4<br>β (95% CI)                  | P value      |
| Anterior corpus callosum  | High WMH volume (n=371) | <b>-0.03</b><br><b>(-0.06, -0.003)</b> | <b>0.03</b>       | -0.03<br>(-0.06, 0.001)                | 0.05         | -0.01<br>(-0.05, 0.02)                | 0.40         | -0.01<br>(-0.05, 0.02)                 | 0.47         |
|                           | Low WMH volume (n=371)  | -0.03<br>(-0.06, 0.01)                 | 0.13              | -0.03<br>(-0.07, 0.01)                 | 0.13         | -0.03<br>(-0.07, 0.01)                | 0.10         | -0.03<br>(-0.07, 0.01)                 | 0.09         |
| Posterior corpus callosum | High WMH volume (n=371) | <b>-0.03</b><br><b>(-0.06, -0.002)</b> | <b>0.03</b>       | -0.02<br>(-0.05, 0.01)                 | 0.13         | -0.01<br>(-0.04, 0.03)                | 0.61         | -0.003<br>(-0.04, 0.03)                | 0.88         |
|                           | Low WMH volume (n=371)  | -0.002<br>(-0.04, 0.03)                | 0.91              | 0.00004<br>(-0.03, 0.03)               | 0.99         | -0.03<br>(-0.07, 0.01)                | 0.12         | -0.03<br>(-0.06, 0.01)                 | 0.15         |
| Frontal lobe              | High WMH volume (n=371) | <b>-0.07</b><br><b>(-0.10, -0.04)</b>  | <b>&lt;0.0001</b> | <b>-0.05</b><br><b>(-0.07, -0.02)</b>  | <b>0.001</b> | <b>-0.05</b><br><b>(-0.09, -0.02)</b> | <b>0.001</b> | <b>-0.04</b><br><b>(-0.07, -0.02)</b>  | <b>0.002</b> |
|                           | Low WMH volume (n=371)  | -0.02<br>(-0.06, 0.01)                 | 0.14              | -0.02<br>(-0.05, 0.01)                 | 0.27         | -0.02<br>(-0.06, 0.01)                | 0.15         | -0.02<br>(-0.06, 0.01)                 | 0.17         |
| Temporal lobe             | High WMH volume (n=371) | <b>-0.05</b><br><b>(-0.08, -0.01)</b>  | <b>0.004</b>      | <b>-0.03</b><br><b>(-0.06, -0.002)</b> | <b>0.04</b>  | <b>-0.05</b><br><b>(-0.08, -0.02)</b> | <b>0.002</b> | <b>-0.04</b><br><b>(-0.08, -0.01)</b>  | <b>0.01</b>  |
|                           | Low WMH volume (n=371)  | -0.02<br>(-0.05, 0.02)                 | 0.35              | -0.02<br>(-0.05, 0.02)                 | 0.37         | -0.03<br>(-0.07, 0.005)               | 0.09         | -0.03<br>(-0.07, 0.004)                | 0.07         |
| Occipital lobe            | High WMH volume (n=371) | <b>-0.06</b><br><b>(-0.09, -0.03)</b>  | <b>0.0001</b>     | <b>-0.05</b><br><b>(-0.08, -0.02)</b>  | <b>0.001</b> | <b>-0.05</b><br><b>(-0.08, -0.02)</b> | <b>0.003</b> | <b>-0.04</b><br><b>(-0.08, -0.01)</b>  | <b>0.01</b>  |
|                           | Low WMH volume (n=371)  | 0.002<br>(-0.03, 0.04)                 | 0.90              | 0.005<br>(-0.03, 0.04)                 | 0.80         | 0.003<br>(-0.04, 0.04)                | <b>0.04</b>  | 0.003<br>(-0.04, 0.04)                 | 0.90         |
| Parietal lobe             | High WMH volume (n=371) | <b>-0.06</b><br><b>(-0.09, -0.03)</b>  | <b>0.0003</b>     | <b>-0.03</b><br><b>(-0.06, -0.01)</b>  | <b>0.02</b>  | <b>-0.04</b><br><b>(-0.08, -0.01)</b> | <b>0.01</b>  | <b>-0.03</b><br><b>(-0.06, -0.001)</b> | <b>0.04</b>  |
|                           | Low WMH volume (n=371)  | -0.01<br>(-0.04, 0.02)                 | 0.64              | -0.002<br>(-0.03, 0.03)                | 0.89         | -0.01<br>(-0.04, 0.02)                | 0.49         | -0.01<br>(-0.04, 0.02)                 | 0.54         |
| Overall                   | High WMH volume (n=371) | <b>-0.07</b><br><b>(-0.10, -0.04)</b>  | <b>&lt;0.0001</b> | <b>-0.05</b><br><b>(-0.07, -0.02)</b>  | <b>0.001</b> | <b>-0.06</b><br><b>(-0.09, -0.02)</b> | <b>0.001</b> | <b>-0.04</b><br><b>(-0.07, -0.02)</b>  | <b>0.003</b> |
|                           | Low WMH volume (n=371)  | -0.02<br>(-0.05, 0.01)                 | 0.27              | -0.01<br>(-0.05, 0.02)                 | 0.42         | -0.02<br>(-0.06, 0.01)                | 0.19         | -0.02<br>(-0.06, 0.01)                 | 0.21         |

Bold indicates statistical significance. β is the difference (unadjusted for Model 1, adjusted for Model 2 to Model 4) of MDs between high and non-high cfPWV.

Model 1: Unadjusted.

Model 2: Adjusted for volume of white matter hyperintensities.

Model 3: Adjusted for age, sex, race-center, education, APOE genotype, ever smoking, ever drinking, body mass index, mean arterial pressure, diabetes, physical activity (total minutes/week), LDL-C, heart rate

Model 4: Adjusted for factors included in Model 2 and Model 3.

**Table S8. Association of cfPWV and z-scores of FA (n=1484). Mean differences estimated by multivariable linear regression with further adjustment for FAs of other locations.**

| Regions                   | cfPWV (m/s)                           |                   |                                       |               |                                        |             |                                        |             |
|---------------------------|---------------------------------------|-------------------|---------------------------------------|---------------|----------------------------------------|-------------|----------------------------------------|-------------|
|                           | Model 1<br>β (95% CI)                 | P value           | Model 2<br>β (95% CI)                 | P value       | Model 3<br>β (95% CI)                  | P value     | Model 4<br>β (95% CI)                  | P value     |
| Anterior corpus callosum  | -0.002<br>(-0.01, 0.01)               | 0.70              | -0.01<br>(-0.02, 0.01)                | 0.37          | 0.004<br>(-0.01, 0.02)                 | 0.58        | 0.003<br>(-0.01, 0.02)                 | 0.71        |
| Posterior corpus callosum | -0.01<br>(-0.02, 0.01)                | 0.43              | -0.003<br>(-0.02, 0.01)               | 0.68          | -0.01<br>(-0.02, 0.01)                 | 0.30        | -0.01<br>(-0.02, 0.01)                 | 0.35        |
| Frontal lobe              | <b>-0.02</b><br><b>(-0.03, -0.01)</b> | <b>&lt;0.0001</b> | <b>-0.01</b><br><b>(-0.02, -0.01)</b> | <b>0.0003</b> | -0.01<br>(-0.02, 0.002)                | 0.11        | -0.01<br>(-0.01, 0.003)                | 0.18        |
| Temporal lobe             | 0.001<br>(-0.01, 0.01)                | 0.88              | -0.001<br>(-0.01, 0.01)               | 0.84          | <b>-0.01</b><br><b>(-0.03, -0.003)</b> | <b>0.02</b> | <b>-0.02</b><br><b>(-0.03, -0.003)</b> | <b>0.01</b> |
| Occipital lobe            | 0.004<br>(-0.01, 0.02)                | 0.50              | -0.002<br>(-0.01, 0.01)               | 0.76          | 0.003<br>(-0.01, 0.02)                 | 0.68        | 0.001<br>(-0.01, 0.01)                 | 0.83        |
| Parietal lobe             | 0.01<br>(-0.002, 0.01)                | 0.15              | <b>0.01</b><br><b>(0.002, 0.02)</b>   | <b>0.01</b>   | 0.004<br>(-0.004, -0.01)               | 0.31        | 0.01<br>(-0.003, 0.01)                 | 0.20        |

Bold indicates statistical significance. β is the difference (unadjusted for Model 1, adjusted for Model 2 to Model 4) of FAs between high and non-high cfPWV.

Model 1: Adjusted for FAs in other regions.

Model 2: Adjusted for volume of white matter hyperintensities.

Model 3: Adjusted for age, sex, race-center, education, APOE genotype, ever smoking, ever drinking, body mass index, mean arterial pressure, diabetes, physical activity (total minutes/week), LDL-C, heart rate

Model 4: Adjusted for factors included in Model 2 and Model 3.

**Table S7. Association of cfPWV and z-scores of MD (n=1484).** Mean differences estimated by multivariable linear regression by cognitive status.

| Regions                   | Cognitive status     | cfPWV (m/s)                          |                   |                                     |              |                                     |                   |                                      |              |
|---------------------------|----------------------|--------------------------------------|-------------------|-------------------------------------|--------------|-------------------------------------|-------------------|--------------------------------------|--------------|
|                           |                      | Model 1<br>β (95% CI)                | P value           | Model 2<br>β (95% CI)               | P value      | Model 3<br>β (95% CI)               | P value           | Model 4<br>β (95% CI)                | P value      |
| Anterior corpus callosum  | Normal (n=937)       | <b>0.04</b><br><b>(0.02, 0.06)</b>   | <b>0.0003</b>     | <b>0.03</b><br><b>(0.01, 0.05)</b>  | <b>0.001</b> | <b>0.02</b><br><b>(0.003, 0.04)</b> | <b>0.02</b>       | <b>0.02</b><br><b>(0.004, 0.04)</b>  | <b>0.02</b>  |
|                           | MCI/dementia (n=545) | <b>0.03</b><br><b>(0.01, 0.06)</b>   | <b>0.01</b>       | <b>0.03</b><br><b>(0.003, 0.05)</b> | <b>0.03</b>  | 0.03<br>(-0.001, 0.05)              | 0.06              | 0.02<br>(-0.001, 0.05)               | 0.06         |
| Posterior corpus callosum | Normal (n=937)       | 0.02<br>(-0.004, 0.04)               | 0.12              | 0.01<br>(-0.01, 0.03)               | 0.19         | <b>0.03</b><br><b>(0.01, 0.05)</b>  | <b>0.01</b>       | <b>0.02</b><br><b>(0.005, 0.04)</b>  | <b>0.01</b>  |
|                           | MCI/dementia (n=545) | 0.02<br>(-0.01, 0.04)                | 0.15              | 0.01<br>(-0.01, 0.04)               | 0.23         | 0.02<br>(-0.01, 0.04)               | 0.18              | 0.02<br>(-0.01, 0.04)                | 0.20         |
| Frontal lobe              | Normal (n=937)       | <b>0.05</b><br><b>(0.03, 0.07)</b>   | <b>&lt;0.0001</b> | <b>0.03</b><br><b>(0.01, 0.05)</b>  | <b>0.001</b> | <b>0.03</b><br><b>(0.01, 0.05)</b>  | <b>0.001</b>      | <b>0.02</b><br><b>(0.01, 0.04)</b>   | <b>0.005</b> |
|                           | MCI/dementia (n=545) | <b>0.05</b><br><b>(0.02, 0.07)</b>   | <b>0.0003</b>     | <b>0.02</b><br><b>(0.002, 0.05)</b> | <b>0.03</b>  | 0.03<br>(-0.001, 0.05)              | 0.06              | <b>0.02</b><br><b>(0.0000, 0.04)</b> | <b>0.05</b>  |
| Temporal lobe             | Normal (n=937)       | <b>0.05</b><br><b>(0.03, 0.07)</b>   | <b>&lt;0.0001</b> | <b>0.03</b><br><b>(0.01, 0.05)</b>  | <b>0.002</b> | <b>0.03</b><br><b>(0.02, 0.05)</b>  | <b>&lt;0.0001</b> | <b>0.03</b><br><b>(0.01, 0.04)</b>   | <b>0.001</b> |
|                           | MCI/dementia (n=545) | <b>0.03</b><br><b>(0.002, 0.05)</b>  | <b>0.03</b>       | 0.01<br>(-0.01, 0.03)               | 0.41         | 0.02<br>(-0.01, 0.04)               | 0.22              | 0.01<br>(-0.01, 0.04)                | 0.26         |
| Occipital lobe            | Normal (n=936)       | <b>0.04</b><br><b>(0.02, 0.06)</b>   | <b>&lt;0.0001</b> | <b>0.03</b><br><b>(0.01, 0.05)</b>  | <b>0.003</b> | <b>0.02</b><br><b>(0.002, 0.04)</b> | <b>0.03</b>       | 0.02<br>(-0.003, 0.03)               | 0.09         |
|                           | MCI/dementia (n=545) | <b>0.04</b><br><b>(0.02, 0.07)</b>   | <b>0.002</b>      | <b>0.03</b><br><b>(0.002, 0.05)</b> | <b>0.02</b>  | 0.02<br>(-0.01, 0.04)               | 0.15              | 0.02<br>(-0.01, 0.04)                | 0.18         |
| Parietal lobe             | Normal (n=937)       | <b>0.04</b><br><b>(0.02, 0.06)</b>   | <b>0.0001</b>     | 0.02<br>(-0.002, 0.04)              | 0.08         | <b>0.03</b><br><b>(0.01, 0.04)</b>  | <b>0.005</b>      | <b>0.02</b><br><b>(0.001, 0.03)</b>  | <b>0.04</b>  |
|                           | MCI/dementia (n=545) | <b>0.04</b><br><b>(0.01, 0.06)</b>   | <b>0.01</b>       | 0.01<br>(-0.01, 0.04)               | 0.23         | 0.02<br>(-0.01, 0.05)               | 0.12              | 0.02<br>(-0.004, 0.04)               | 0.12         |
| Overall                   | Normal (n=936)       | <b>0.05</b><br><b>(0.03, 0.07)</b>   | <b>&lt;0.0001</b> | <b>0.03</b><br><b>(0.01, 0.05)</b>  | <b>0.003</b> | <b>0.03</b><br><b>(0.01, 0.05)</b>  | <b>0.001</b>      | <b>0.02</b><br><b>(0.01, 0.04)</b>   | <b>0.004</b> |
|                           | MCI/dementia (n=545) | <b>0.04</b><br><b>(-0.07, -0.02)</b> | <b>0.0003</b>     | 0.02<br>(-0.001, 0.04)              | 0.07         | 0.02<br>(-0.002, 0.05)              | 0.07              | 0.02<br>(-0.001, 0.04)               | 0.06         |

Bold indicates statistical significance. β is the difference (unadjusted for Model 1, adjusted for Model 2 to Model 4) of MDs between high and non-high cfPWV.

Model 1: Unadjusted.

Model 2: Adjusted for volume of white matter hyperintensities.

Model 3: Adjusted for age, sex, race-center, education, APOE genotype, ever smoking, ever drinking, body mass index, mean arterial pressure, diabetes, physical activity (total minutes/week), LDL-C, heart rate

Model 4: Adjusted for factors included in Model 2 and Model 3.



**Table S8. Association of cfPWV and z-scores of MD.** Mean differences estimated by multivariable linear regression by WMH volumes

| Regions                   | Cognitive status           | cfPWV (m/s)                        |                   |                                     |              |                                      |             |                                     |             |
|---------------------------|----------------------------|------------------------------------|-------------------|-------------------------------------|--------------|--------------------------------------|-------------|-------------------------------------|-------------|
|                           |                            | Model 1<br>β (95% CI)              | P value           | Model 2<br>β (95% CI)               | P value      | Model 3<br>β (95% CI)                | P value     | Model 4<br>β (95% CI)               | P value     |
| Anterior corpus callosum  | High WMH volume<br>(n=371) | <b>0.03</b><br><b>(0.01, 0.06)</b> | <b>0.02</b>       | <b>0.03</b><br><b>(0.004, 0.06)</b> | <b>0.03</b>  | 0.02<br>(-0.01, 0.05)                | 0.14        | 0.02<br>(-0.01, 0.05)               | 0.15        |
|                           | Low WMH volume<br>(n=371)  | 0.04<br>(-0.001, 0.07)             | 0.05              | 0.03<br>(-0.01, 0.07)               | 0.09         | <b>0.04</b><br><b>(0.01, 0.08)</b>   | <b>0.01</b> | <b>0.04</b><br><b>(0.01, 0.08)</b>  | <b>0.01</b> |
| Posterior corpus callosum | High WMH volume<br>(n=371) | 0.02<br>(-0.01, 0.05)              | 0.28              | 0.01<br>(-0.02, 0.04)               | 0.49         | 0.001<br>(-0.03, 0.03)               | 0.92        | -0.002<br>(-0.03, 0.03)             | 0.87        |
|                           | Low WMH volume<br>(n=371)  | 0.001<br>(-0.03, 0.04)             | 0.94              | 0.0001<br>(-0.04, 0.04)             | 0.99         | <b>0.03</b><br><b>(0.001, 0.07)</b>  | <b>0.04</b> | <b>0.03</b><br><b>(0.001, 0.07)</b> | <b>0.05</b> |
| Frontal lobe              | High WMH volume<br>(n=371) | <b>0.06</b><br><b>(0.03, 0.09)</b> | <b>0.0002</b>     | <b>0.04</b><br><b>(0.01, 0.06)</b>  | <b>0.01</b>  | <b>0.03</b><br><b>(0.01, 0.06)</b>   | <b>0.02</b> | 0.02<br>(-0.002, 0.05)              | 0.07        |
|                           | Low WMH volume<br>(n=371)  | 0.02<br>(-0.01, 0.05)              | 0.20              | 0.01<br>(-0.02, 0.04)               | <b>0.01</b>  | 0.02<br>(-0.01, 0.04)                | <b>0.05</b> | 0.02<br>(-0.01, 0.04)               | 0.27        |
| Temporal lobe             | High WMH volume<br>(n=371) | <b>0.05</b><br><b>(0.02, 0.07)</b> | <b>0.002</b>      | <b>0.03</b><br><b>(0.004, 0.06)</b> | <b>0.03</b>  | <b>0.03</b><br><b>(0.0004, 0.06)</b> | <b>0.05</b> | 0.02<br>(-0.005, 0.05)              | 0.11        |
|                           | Low WMH volume<br>(n=371)  | 0.02<br>(-0.02, 0.05)              | 0.37              | 0.005<br>(-0.03, 0.04)              | 0.78         | <b>0.03</b><br><b>(0.001, 0.05)</b>  | <b>0.04</b> | 0.02<br>(-0.002, 0.05)              | 0.06        |
| Occipital lobe            | High WMH volume<br>(n=371) | <b>0.06</b><br><b>(0.03, 0.09)</b> | <b>&lt;0.0001</b> | <b>0.05</b><br><b>(0.02, 0.08)</b>  | <b>0.001</b> | <b>0.03</b><br><b>(0.01, 0.06)</b>   | <b>0.02</b> | <b>0.03</b><br><b>(0.002, 0.06)</b> | <b>0.04</b> |
|                           | Low WMH volume<br>(n=371)  | 0.01<br>(-0.03, 0.04)              | 0.72              | -0.003<br>(-0.04, 0.03)             | 0.86         | 0.003<br>(-0.03, 0.03)               | 0.87        | -0.0005<br>(-0.03, 0.03)            | 0.98        |
| Parietal lobe             | High WMH volume<br>(n=371) | <b>0.05</b><br><b>(0.02, 0.08)</b> | <b>0.002</b>      | 0.03<br>(-0.001, 0.05)              | 0.06         | 0.03<br>(-0.004, 0.06)               | 0.08        | 0.01<br>(-0.01, 0.04)               | 0.27        |
|                           | Low WMH volume<br>(n=371)  | 0.003<br>(-0.03, 0.03)             | 0.85              | -0.005<br>(-0.04, 0.03)             | 0.77         | 0.01<br>(-0.01, 0.04)                | 0.35        | 0.02<br>(-0.02, 0.04)               | 0.44        |
| Overall                   | High WMH volume<br>(n=371) | <b>0.06</b><br><b>(0.03, 0.09)</b> | <b>0.0002</b>     | <b>0.04</b><br><b>(0.01, 0.06)</b>  | <b>0.01</b>  | <b>0.03</b><br><b>(0.005, 0.06)</b>  | <b>0.02</b> | 0.02<br>(-0.002, 0.05)              | 0.08        |
|                           | Low WMH volume<br>(n=371)  | 0.01<br>(-0.02, 0.05)              | 0.42              | 0.004<br>(-0.03, 0.04)              | 0.80         | 0.02<br>(-0.01, 0.04)                | 0.19        | 0.01<br>(-0.01, 0.04)               | 0.26        |

Bold indicates statistical significance. β is the difference (unadjusted for Model 1, adjusted for Model 2 to Model 4) of MDs between high and non-high cfPWV.

Model 1: Unadjusted.

Model 2: Adjusted for volume of white matter hyperintensities.

Model 3: Adjusted for age, sex, race-center, education, APOE genotype, ever smoking, ever drinking, body mass index, mean arterial pressure, diabetes, physical activity (total minutes/week), LDL-C, heart rate

Model 4: Adjusted for factors included in Model 2 and Model 3.

**Table S9. Association of cfPWV and MDs (n=1484).** Mean differences estimated by multivariable linear regression with further adjustment for MDs of other locations

| Regions                   | cfPWV (m/s)                            |                   |                                       |                   |                          |         |                          |         |
|---------------------------|----------------------------------------|-------------------|---------------------------------------|-------------------|--------------------------|---------|--------------------------|---------|
|                           | Model 1<br>β (95% CI)                  | P value           | Model 2<br>β (95% CI)                 | P value           | Model 3<br>β (95% CI)    | P value | Model 4<br>β (95% CI)    | P value |
| Anterior corpus callosum  | 0.01<br>(-0.002, 0.02)                 | 0.11              | <b>0.02</b><br><b>(0.004, 0.03)</b>   | <b>0.01</b>       | 0.004<br>(-0.01, 0.02)   | 0.53    | 0.01<br>(-0.01, 0.02)    | 0.43    |
| Posterior corpus callosum | -0.01<br>(-0.02, 0.002)                | 0.10              | -0.004<br>(-0.02, 0.01)               | 0.48              | 0.01<br>(-0.005, 0.02)   | 0.24    | 0.01<br>(-0.004, 0.02)   | 0.21    |
| Frontal lobe              | <b>0.01</b><br><b>(0.01, 0.02)</b>     | <b>&lt;0.0001</b> | <b>0.01</b><br><b>(0.005, 0.02)</b>   | <b>0.001</b>      | 0.01<br>(-0.001, 0.01)   | 0.07    | 0.01<br>(-0.001, 0.01)   | 0.10    |
| Temporal lobe             | 0.003<br>(-0.003, 0.01)                | 0.34              | 0.003<br>(-0.003, 0.01)               | 0.32              | 0.01<br>(-0.001, 0.01)   | 0.10    | 0.01<br>(-0.001, 0.01)   | 0.10    |
| Occipital lobe            | <b>0.01</b><br><b>(0.0003, 0.02)</b>   | <b>0.04</b>       | <b>0.01</b><br><b>(0.004, 0.02)</b>   | <b>0.005</b>      | -0.002<br>(-0.01, 0.01)  | 0.60    | -0.002<br>(-0.01, 0.01)  | 0.69    |
| Parietal lobe             | <b>-0.01</b><br><b>(-0.01, -0.003)</b> | <b>0.003</b>      | <b>-0.01</b><br><b>(-0.02, -0.01)</b> | <b>&lt;0.0001</b> | -0.003<br>(-0.01, 0.002) | 0.25    | -0.004<br>(-0.01, 0.002) | 0.17    |

Bold indicates statistical significance. β is the difference (unadjusted for Model 1, adjusted for Model 2 to Model 4) of MDs between high and non-high cfPWV.

Model 1: Adjusted for MDs in other regions.

Model 2: Adjusted for volume of white matter hyperintensities.

Model 3: Adjusted for age, sex, race-center, education, APOE genotype, ever smoking, ever drinking, body mass index, mean arterial pressure, diabetes, physical activity (total minutes/week), LDL-C, heart rate

Model 4: Adjusted for factors included in Model 2 and Model 3.

**Table S10. Association of high cfPWV (upper 25<sup>th</sup> percentile) and z-scores of FA. Mean differences estimated by multivariable linear regression**

| Regions                   | Elevated cfPWV (cfPWV $\geq$ 13.65 m/s) |                   |                                |              |                                |               |                                |              |
|---------------------------|-----------------------------------------|-------------------|--------------------------------|--------------|--------------------------------|---------------|--------------------------------|--------------|
|                           | Model 1<br>$\beta$ (95% CI)             | P value           | Model 2<br>$\beta$ (95% CI)    | P value      | Model 3<br>$\beta$ (95% CI)    | P value       | Model 4<br>$\beta$ (95% CI)    | P value      |
| Anterior corpus callosum  | <b>-0.35</b><br>(-0.55, -0.15)          | <b>0.001</b>      | <b>-0.30</b><br>(-0.50, -0.10) | <b>0.003</b> | <b>-0.30</b><br>(-0.51, -0.09) | <b>0.01</b>   | <b>-0.28</b><br>(-0.49, 0.07)  | <b>0.01</b>  |
| Posterior corpus callosum | <b>-0.25</b><br>(-0.44, -0.07)          | <b>0.01</b>       | -0.16<br>(-0.34, 0.02)         | 0.08         | <b>-0.20</b><br>(-0.39, -0.01) | <b>0.04</b>   | -0.15<br>(-0.33, 0.03)         | 0.11         |
| Frontal lobe              | <b>-0.45</b><br>(-0.65, -0.25)          | <b>&lt;0.0001</b> | <b>-0.29</b><br>(-0.47, -0.11) | <b>0.002</b> | <b>-0.39</b><br>(-0.59, -0.18) | <b>0.0002</b> | <b>-0.30</b><br>(-0.49, -0.12) | <b>0.001</b> |
| Temporal lobe             | -0.20<br>(-0.40, 0.01)                  | 0.06              | -0.10<br>(-0.31, 0.10)         | 0.31         | <b>-0.34</b><br>(-0.55, -0.12) | <b>0.002</b>  | <b>-0.29</b><br>(-0.49, -0.08) | <b>0.01</b>  |
| Occipital lobe            | <b>-0.29</b><br>(-0.50, -0.08)          | <b>0.01</b>       | <b>-0.23</b><br>(-0.44, -0.02) | <b>0.03</b>  | <b>-0.31</b><br>(-0.52, -0.09) | <b>0.01</b>   | <b>-0.28</b><br>(-0.50, -0.06) | <b>0.01</b>  |
| Parietal lobe             | <b>-0.31</b><br>(-0.51, -0.11)          | <b>0.002</b>      | -0.15<br>(-0.33, 0.04)         | 0.12         | <b>-0.32</b><br>(-0.53, -0.12) | <b>0.002</b>  | <b>-0.23</b><br>(-0.42, -0.05) | <b>0.01</b>  |
| Overall                   | <b>-0.40</b><br>(-0.61, -0.20)          | <b>&lt;0.0001</b> | <b>-0.25</b><br>(-0.44, -0.06) | <b>0.01</b>  | <b>-0.40</b><br>(-0.61, -0.20) | <b>0.0001</b> | <b>-0.32</b><br>(-0.51, -0.13) | <b>0.001</b> |

Bold indicates statistical significance.  $\beta$  is the difference (unadjusted for Model 1, adjusted for Model 2 to Model 4) of FAs between high and non-high cfPWV.

Model 1: Unadjusted.

Model 2: Adjusted for volume of white matter hyperintensities.

Model 3: Adjusted for age, sex, race-center, education, APOE genotype, ever smoking, ever drinking, body mass index, mean arterial pressure, diabetes, physical activity (total minutes/week), LDL-C, heart rate

Model 4: Adjusted for factors included in Model 2 and Model 3.

**Table S11. Association of high cfPWV (upper 25<sup>th</sup> percentile) and MDs.** Mean differences estimated by multivariable linear regression.

| Regions                   | Elevated cfPWV (cfPWV $\geq$ 13.65 m/s) |                   |                             |              |                             |              |                             |             |
|---------------------------|-----------------------------------------|-------------------|-----------------------------|--------------|-----------------------------|--------------|-----------------------------|-------------|
|                           | Model 1<br>$\beta$ (95% CI)             | P value           | Model 2<br>$\beta$ (95% CI) | P value      | Model 3<br>$\beta$ (95% CI) | P value      | Model 4<br>$\beta$ (95% CI) | P value     |
| Anterior corpus callosum  | <b>0.35</b><br>(0.15, 0.55)             | <b>0.001</b>      | <b>0.30</b><br>(0.10, 0.50) | <b>0.003</b> | <b>0.26</b><br>(0.08, 0.44) | <b>0.004</b> | <b>0.25</b><br>(0.07, 0.43) | <b>0.01</b> |
| Posterior corpus callosum | <b>0.21</b><br>(0.01, 0.41)             | <b>0.04</b>       | 0.13<br>(-0.06, 0.33)       | 0.18         | <b>0.22</b><br>(0.05, 0.39) | <b>0.01</b>  | <b>0.18</b><br>(0.02, 0.35) | <b>0.03</b> |
| Frontal lobe              | <b>0.41</b><br>(0.21, 0.62)             | <b>&lt;0.0001</b> | <b>0.22</b><br>(0.04, 0.40) | <b>0.02</b>  | <b>0.27</b><br>(0.10, 0.45) | <b>0.003</b> | <b>0.18</b><br>(0.02, 0.33) | <b>0.02</b> |
| Temporal lobe             | <b>0.31</b><br>(0.10, 0.51)             | <b>0.003</b>      | 0.16<br>(-0.03, 0.35)       | 0.10         | <b>0.21</b><br>(0.04, 0.38) | <b>0.01</b>  | 0.15<br>(-0.01, 0.31)       | 0.06        |
| Occipital lobe            | <b>0.33</b><br>(0.13, 0.53)             | <b>0.001</b>      | <b>0.22</b><br>(0.03, 0.42) | <b>0.02</b>  | <b>0.19</b><br>(0.01, 0.36) | <b>0.03</b>  | 0.14<br>(-0.03, 0.31)       | 0.10        |
| Parietal lobe             | <b>0.33</b><br>(0.13, 0.53)             | <b>0.001</b>      | 0.15<br>(-0.03, 0.33)       | 0.11         | <b>0.27</b><br>(0.10, 0.43) | <b>0.002</b> | <b>0.18</b><br>(0.04, 0.32) | <b>0.01</b> |
| Overall                   | <b>0.38</b><br>(0.18, 0.58)             | <b>0.0002</b>     | <b>0.20</b><br>(0.02, 0.39) | <b>0.03</b>  | <b>0.27</b><br>(0.10, 0.43) | <b>0.002</b> | <b>0.18</b><br>(0.04, 0.33) | <b>0.01</b> |

Bold indicates statistical significance.  $\beta$  is the difference (unadjusted for Model 1, adjusted for Model 2 to Model 4) of MDs between high and non-high cfPWV.

Model 1: Unadjusted.

Model 2: Adjusted for volume of white matter hyperintensities.

Model 3: Adjusted for age, sex, race-center, education, APOE genotype, ever smoking, ever drinking, body mass index, mean arterial pressure, diabetes, physical activity (total minutes/week), LDL-C, heart rate

Model 4: Adjusted for factors included in Model 2 and Model 3.

Figure S1. Flowchart of participant selection.

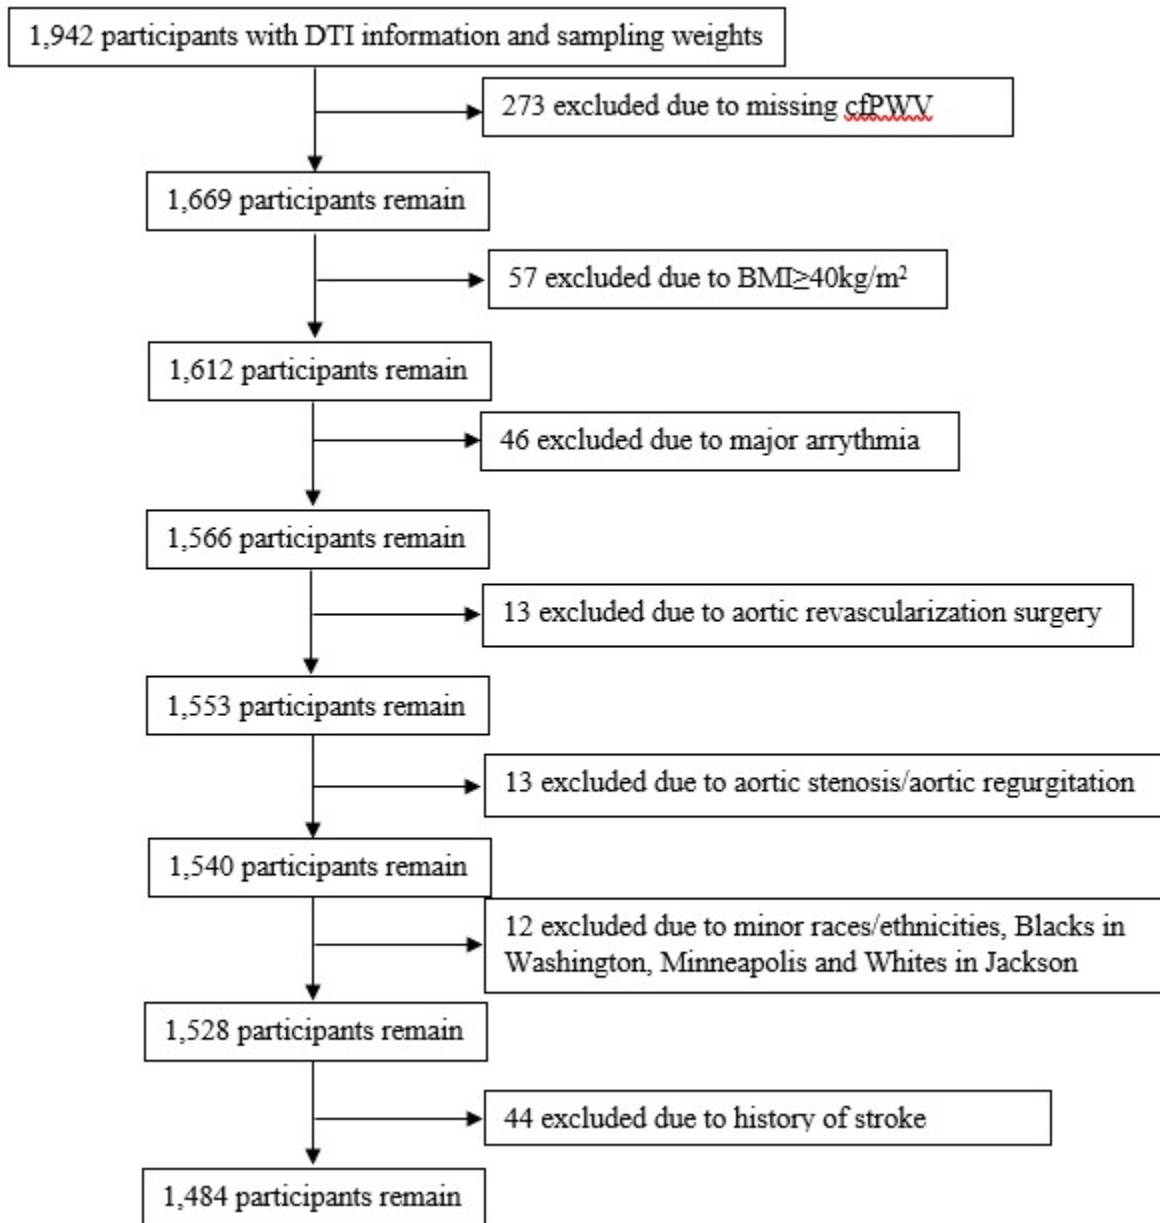

Figure S2. Scatter plot of correlation between cfPWV and white matter microstructural integrity in (A) overall (B) frontal lobe (C) temporal lobe (D) occipital lobe (E) parietal lobe (F) anterior corpus callosum (G) posterior corpus callosum.

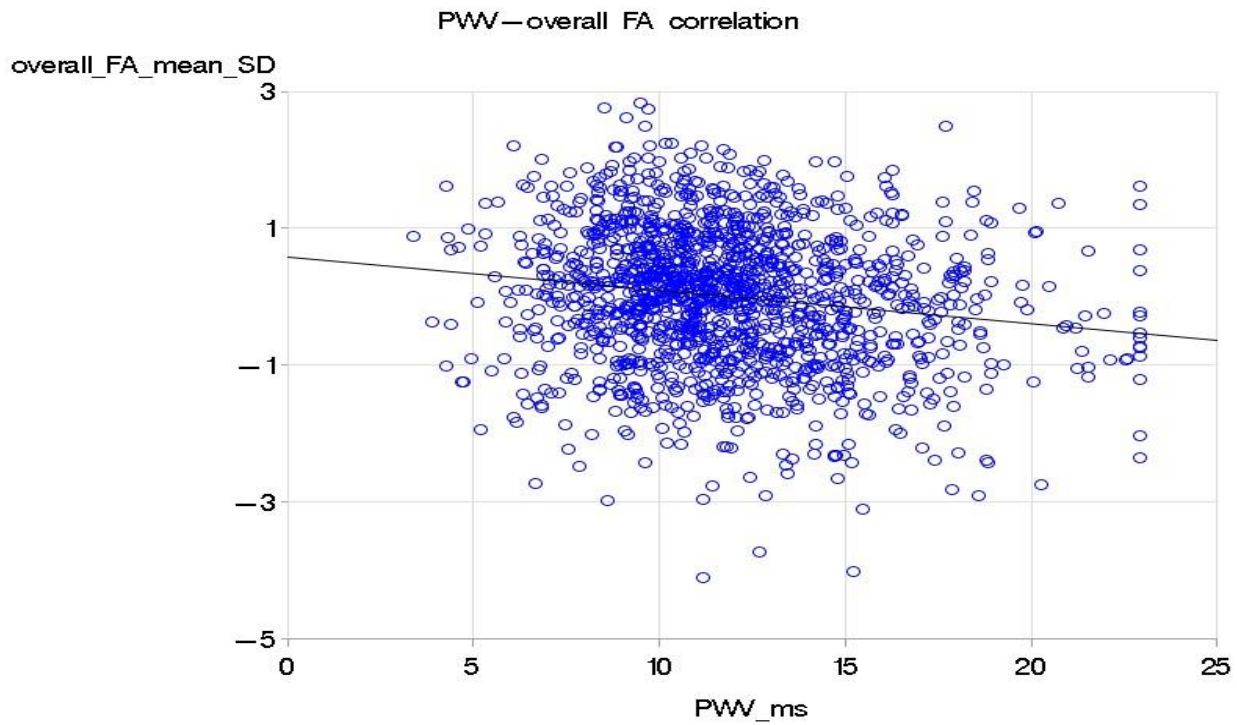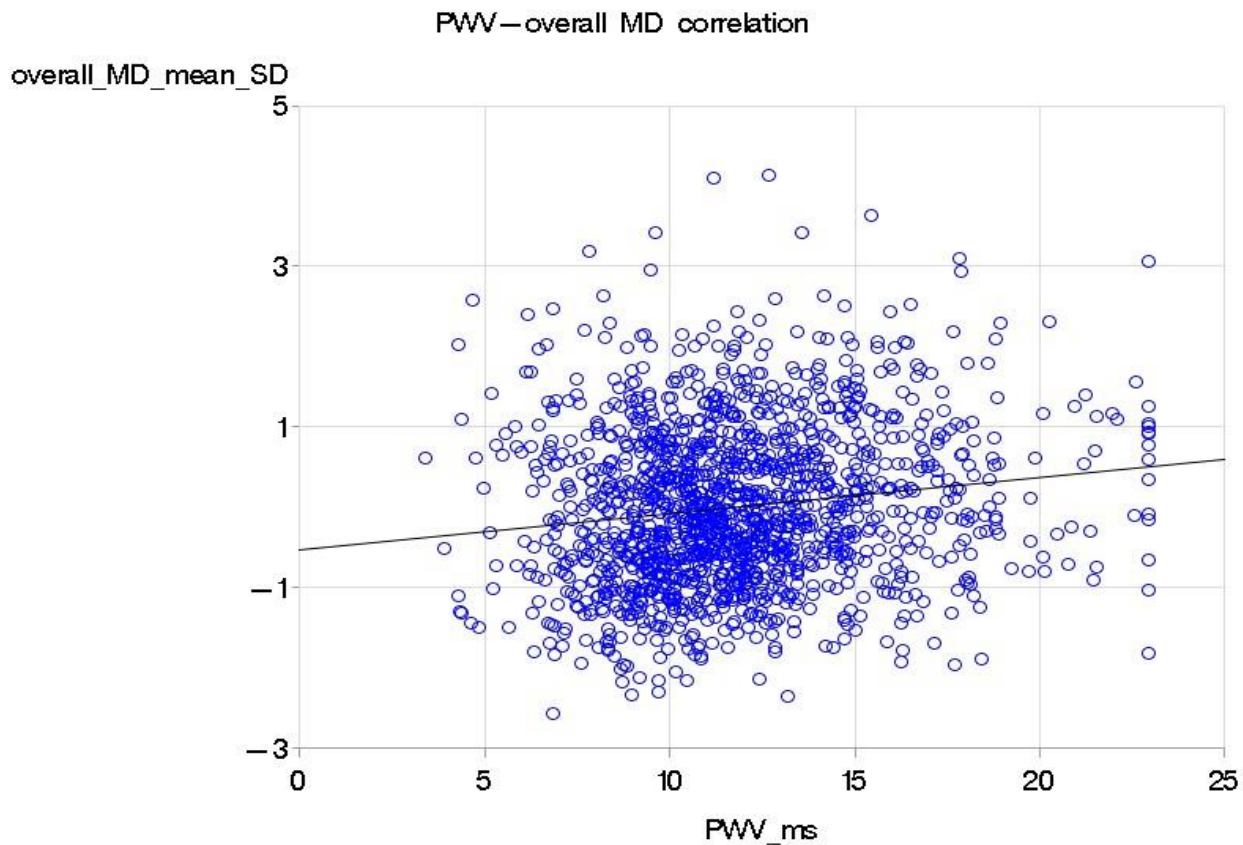

(A)

PWW—frontal lobe FA correlation

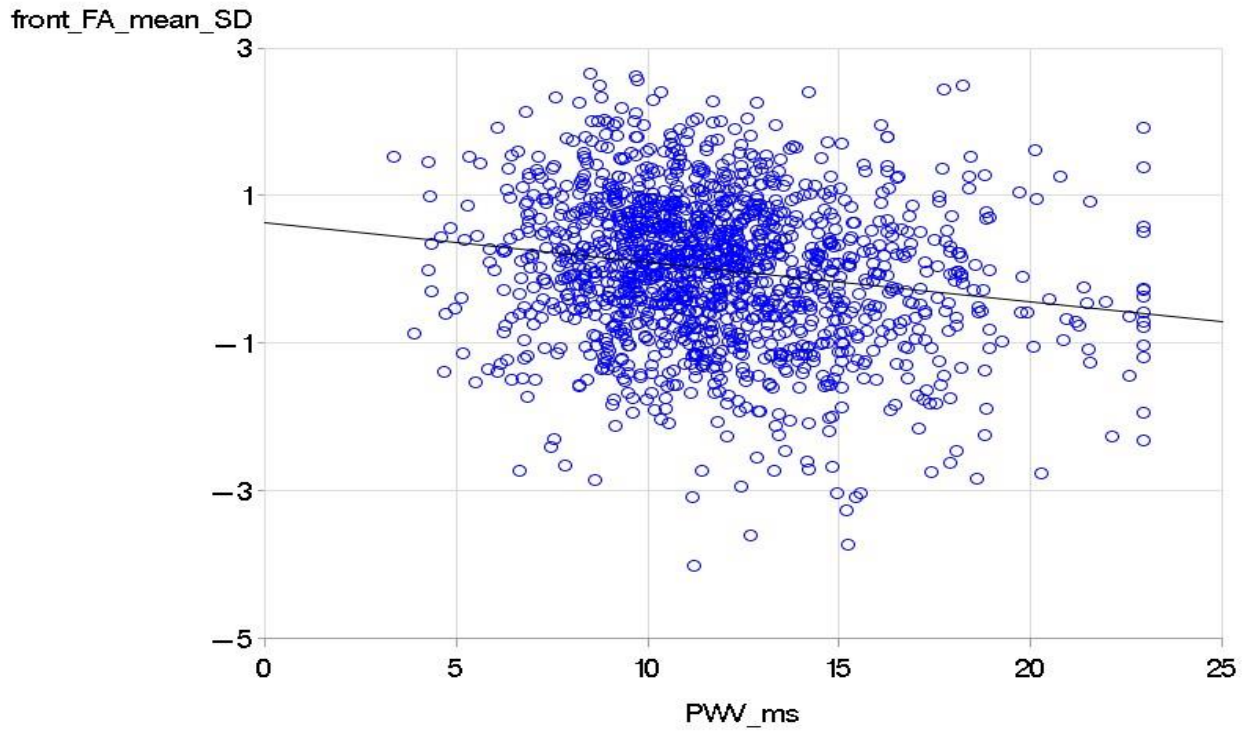

PWW—frontal lobe MD correlation

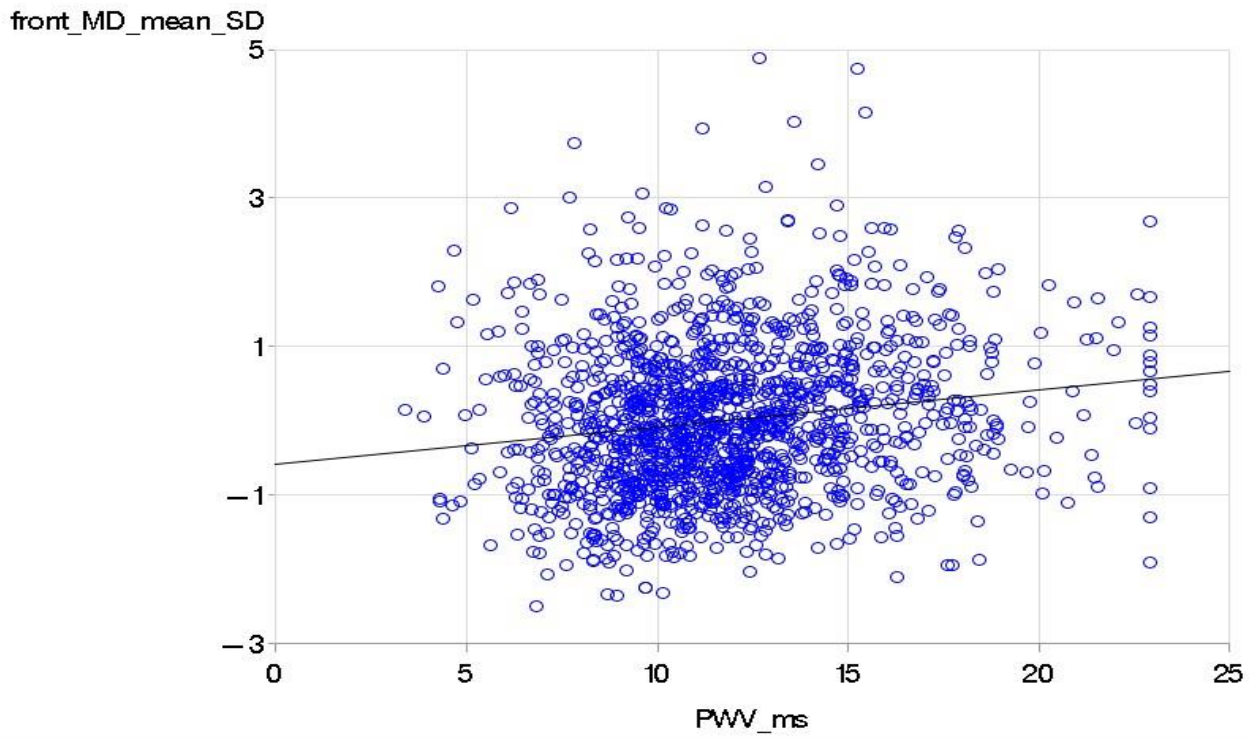

(B)

PWW—temporal lobe FA correlation

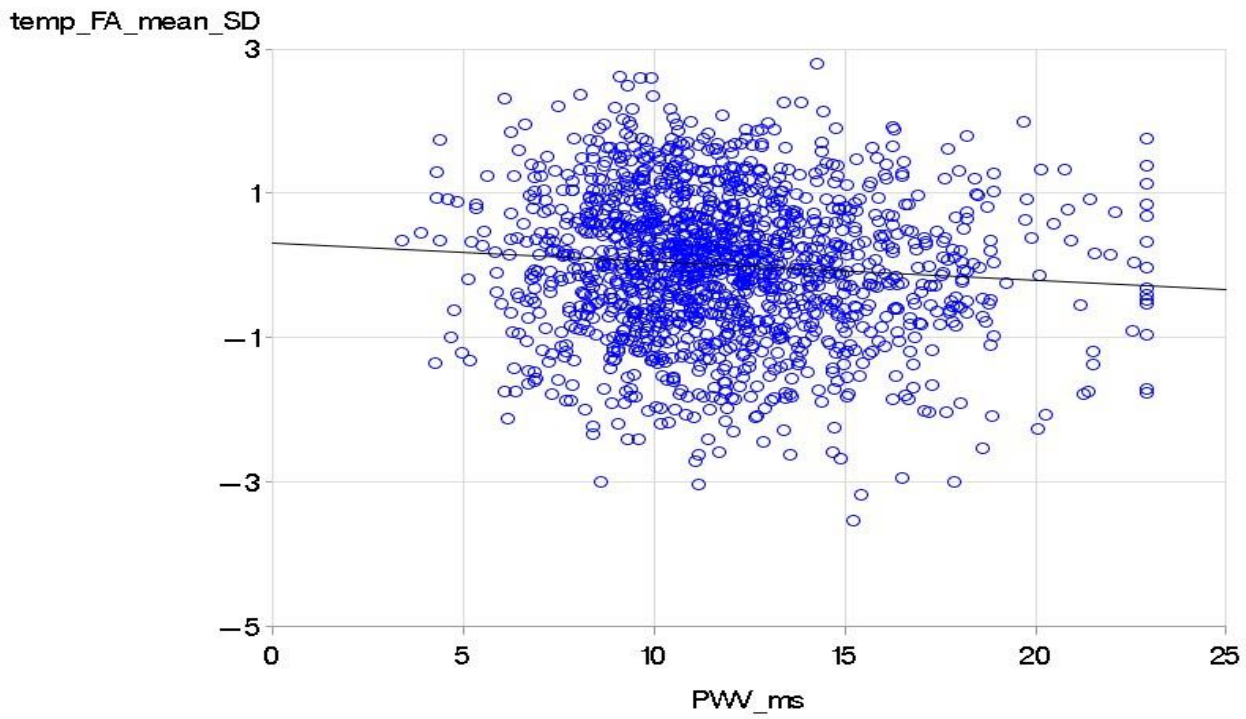

PWW—temporal lobe MD correlation

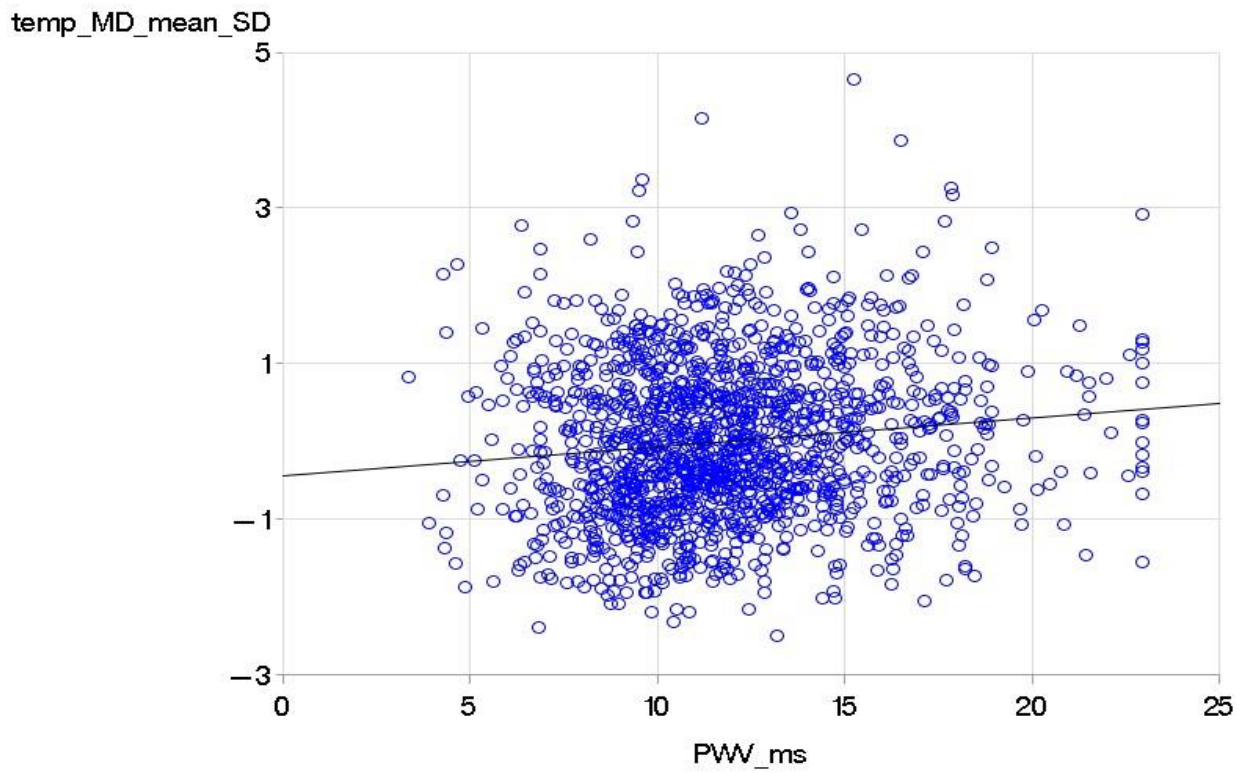

(C)



PWW—occipital lobe FA correlation

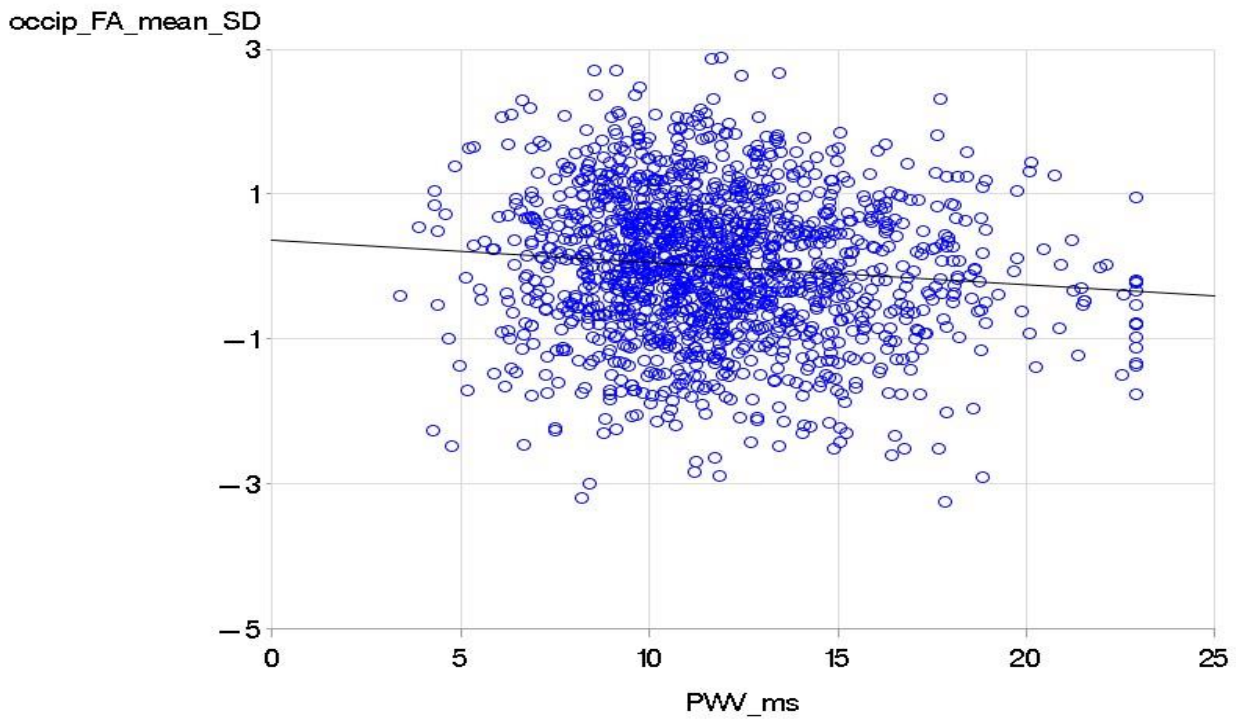

PWW—occipital lobe MD correlation

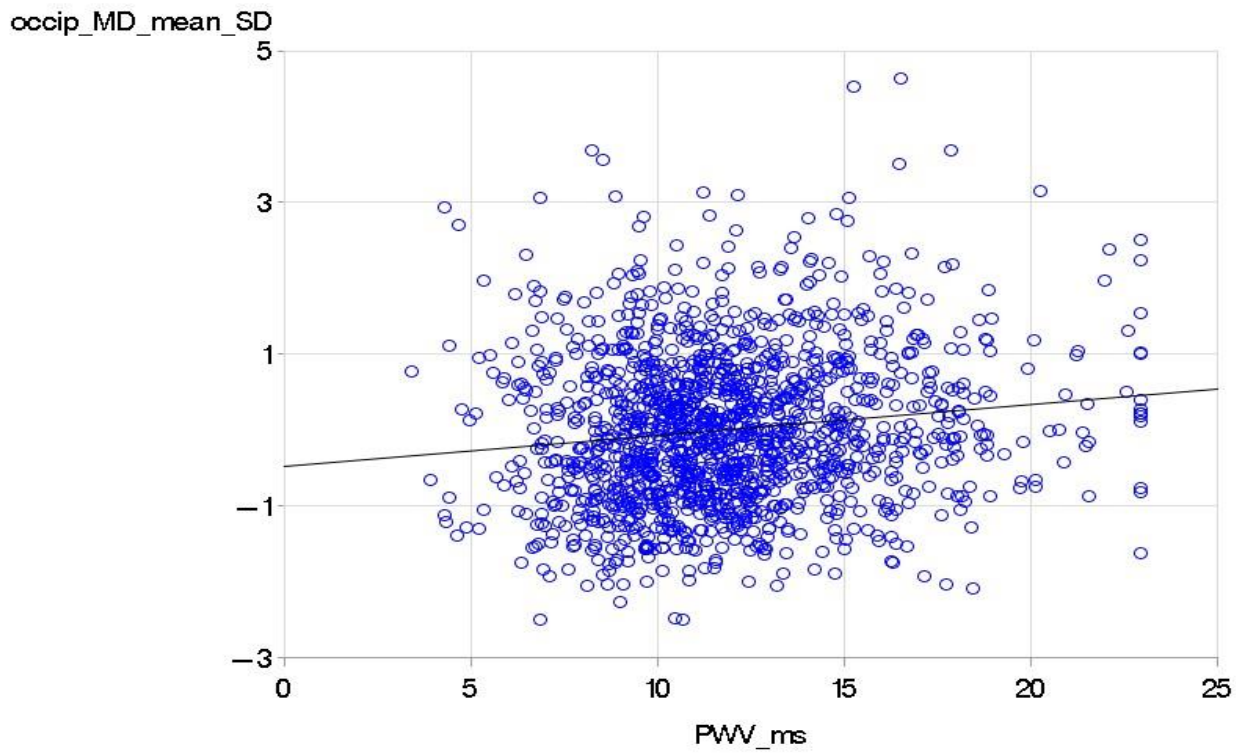

(D)

PWW—parietal lobe FA correlation

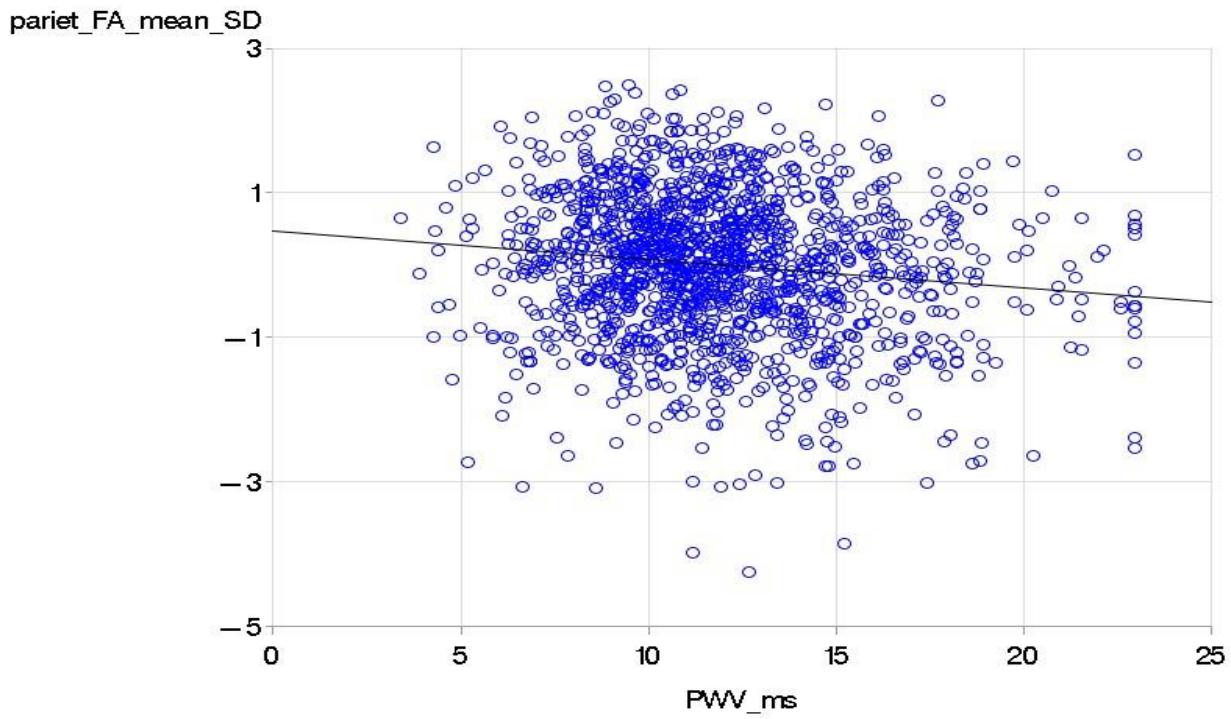

PWW—parietal lobe MD correlation

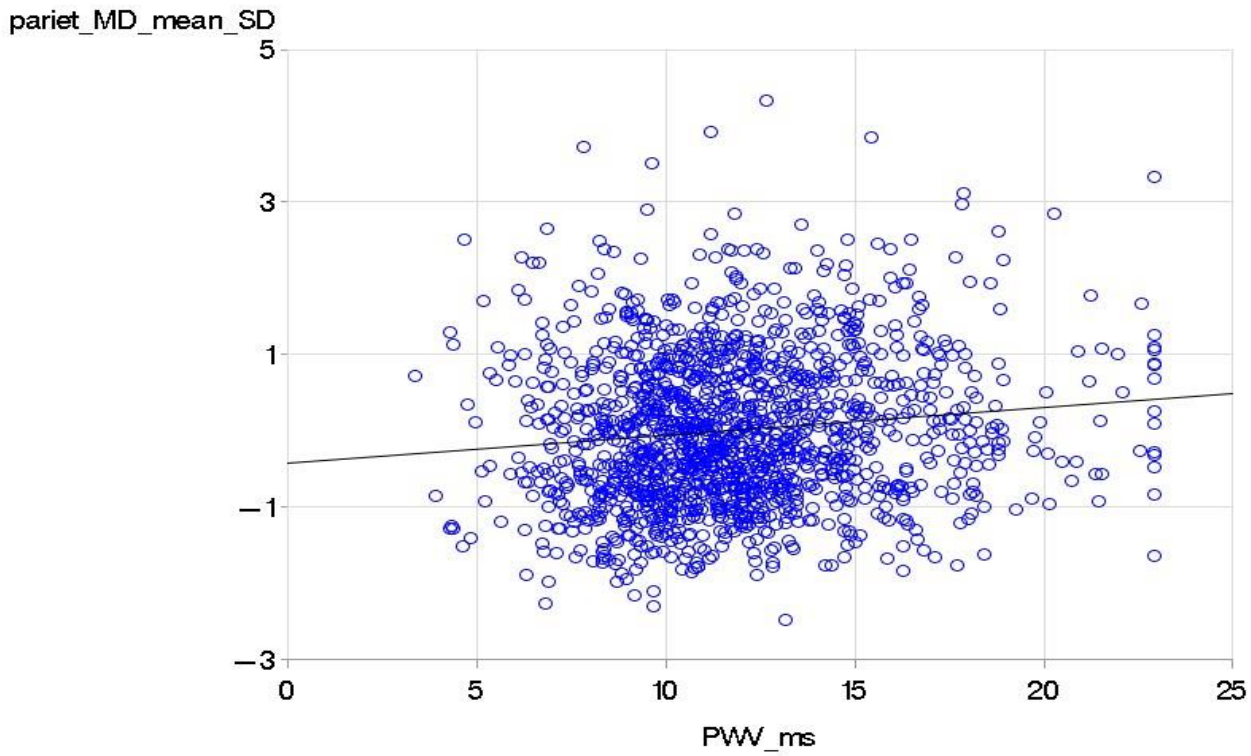

(E)

PWW—anterior corpus callosum FA correlation

anterior\_CC\_FA\_mean\_SD

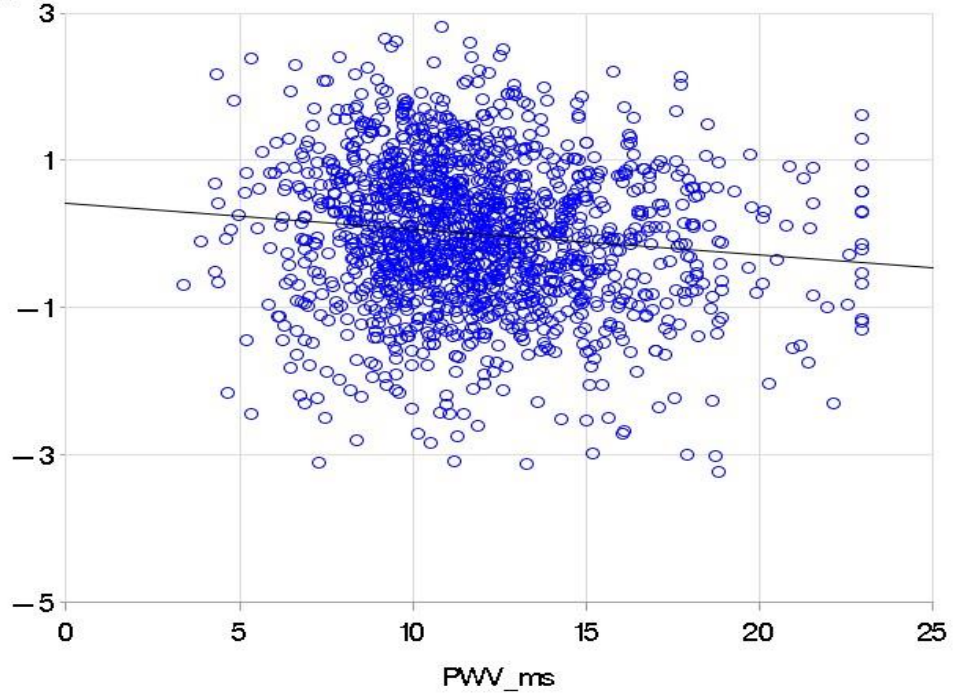

PWW—anterior corpus callosum MD correlation

anterior\_CC\_MD\_mean\_SD

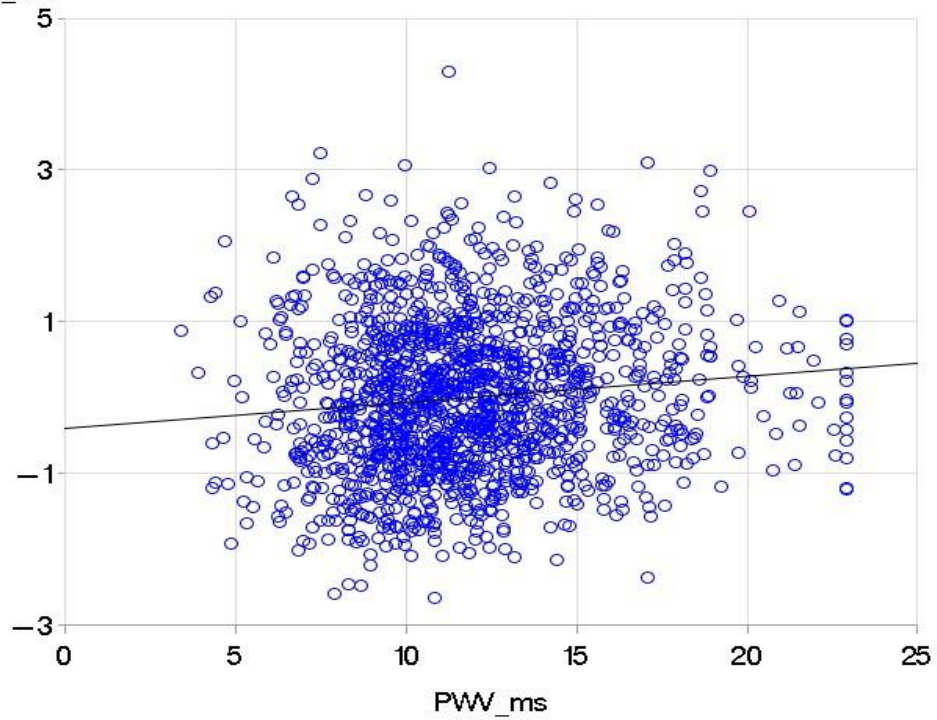

(F)

PWW—posterior corpus callosum FA correlation

posterior\_CC\_FA\_mean\_SD

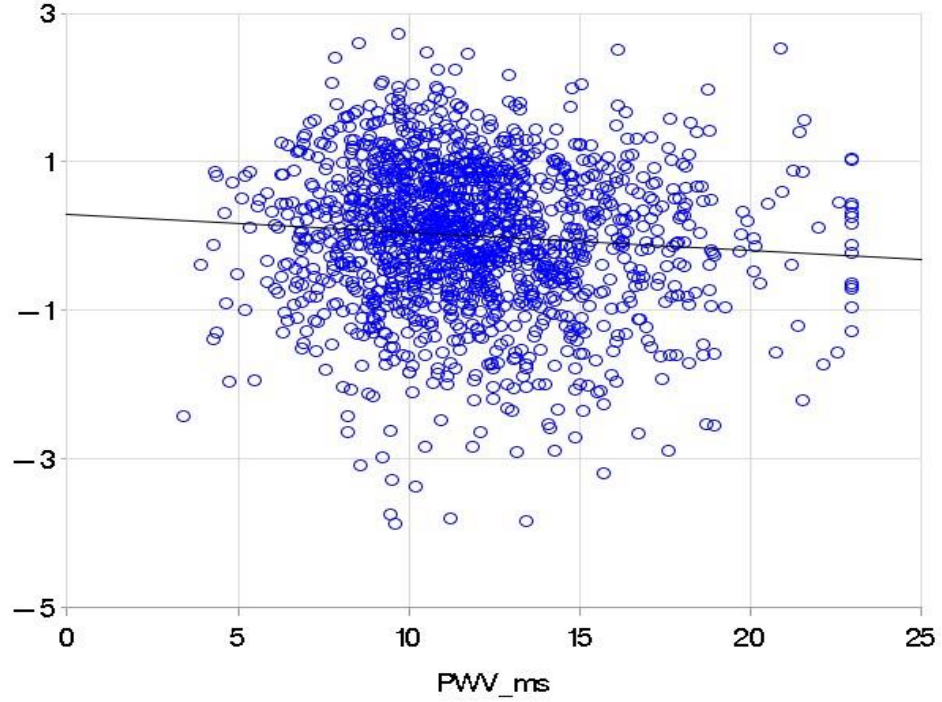

PWW—posterior corpus callosum MD correlation

posterior\_CC\_MD\_mean\_SD

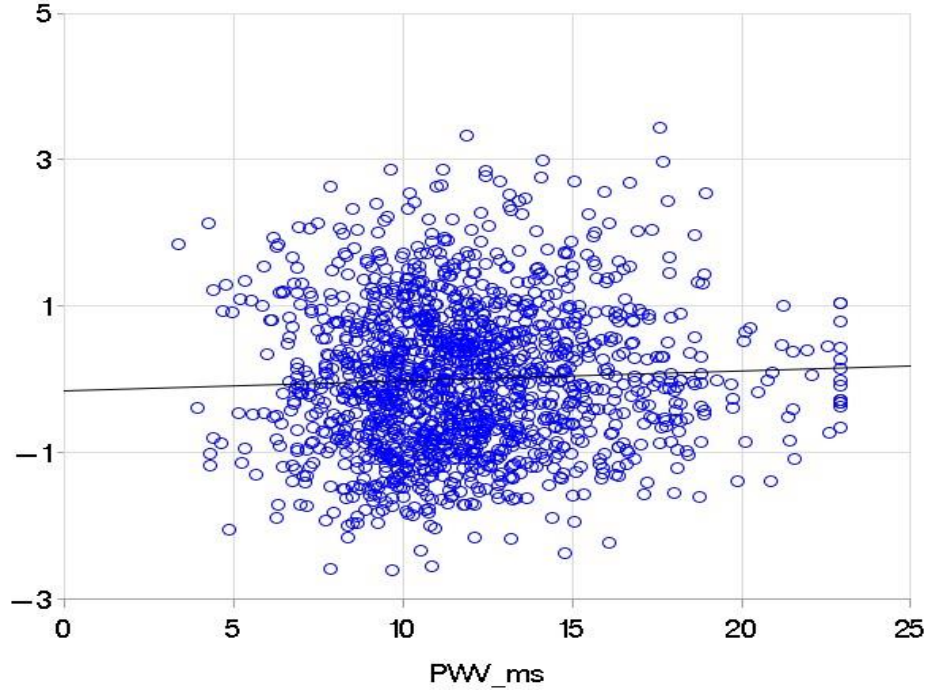

(G)
